# Supplementary material for: Synthesis of Luminescent Ag Nanoclusters with Antibacterial Activity
Source: Hindawi journal article supplement (doi:10.1155/2015/792095), 2015-01-01
Supplement: f1 [file 792095.f1.pdf]

## Synthesis of luminescent Ag nanoclusters with antibacterial activity

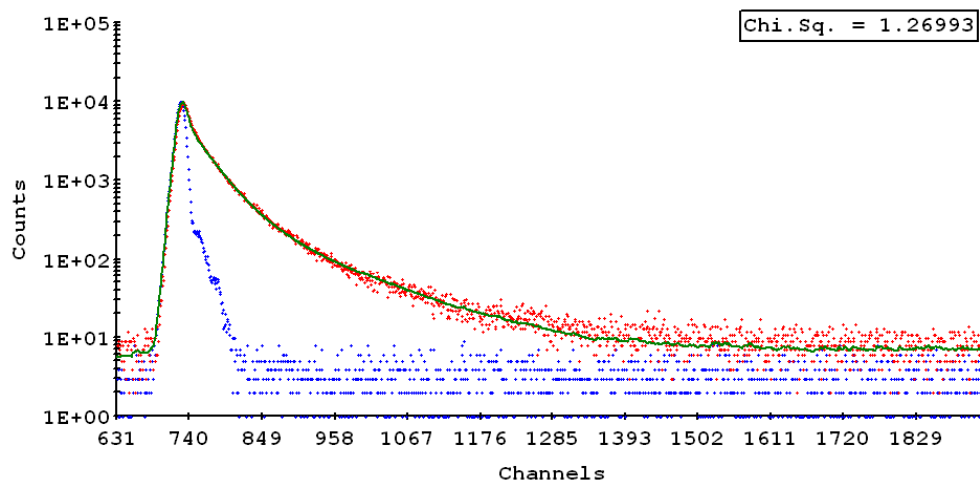

Fig. S1. Time-resolved luminescence of the DHLA-Ag NCs. The equation used to simulate luminescence decay curves:  $\text{Fit} = A + B_1 \exp(-t/\tau_1) + B_2 \exp(-t/\tau_2) + B_3 \exp(-t/\tau_3)$ . Time calibration =  $1.097394\text{E-}10$  sec/ch
